# Supplementary material for: Dendrite-free solid-state lithium batteries enabled by a fluorine doped Li7La3Zr2O12 composite electrolyte and LiAlF4 interphase
Source: Royal Society of Chemistry journal article supplement (doi:10.1039/d4qi01111b), 2024-01-01
Supplement: d4qi01111b1.pdf [file d4qi01111b1.pdf]

## Supporting Information

### **Dendrite-free solid-state lithium batteries enabled by fluorine doped $\text{Li}_7\text{La}_3\text{Zr}_2\text{O}_{12}$ electrolyte and $\text{LiAlF}_4$ Interphase**

Yuezhen Mao, Fanghui Mi, Tianyuan Wang, Zhijun Zhang, Chunwen Sun,\*  
School of Chemical & Environmental Engineering, China University of Mining and  
Technology-Beijing, Beijing 100083, P. R. China.

\* Email: [csun@cumtb.edu.cn](mailto:csun@cumtb.edu.cn) (C. Sun)

**Battery Assemblies and Electrochemical Measurements:** The stainless steel (SS)/solid electrolyte/SS batteries were assembled to determine ionic conductivities. The electrochemical impedance spectroscopy (EIS) was measured at 25°C using a ZENNIUME electrochemical workstation (Zahner, Germany) in the frequency range from 1M Hz to 0.01 Hz with a perturbation of 10 mV. The electrolyte membranes and garent-type electrolytes are sandwiched between a pair of SS-blocking electrodes. The ionic conductivity ( $\sigma$ ) was calculated from the following equation, where  $R$  is the resistance value of the bulk electrolyte measured by EIS, and  $L$  is the thickness of electrolyte membrane, and  $S$  is the area of electrode:

$$\sigma = \frac{L}{RS}$$

Activation energy calculations for the composite solid electrolyte membrane were performed using the Arrhenius formula, where  $\sigma$  denotes the ionic conductivity,  $L$  denotes the thickness of the composite solid electrolyte,  $T$  is the Kelvin temperature, and  $R$  is the molar gas constant 8.314 J mol<sup>-1</sup> K<sup>-1</sup>.

$$\sigma = A \exp\left(\frac{-E_a}{RT}\right)$$

The Li<sup>+</sup> transference number of electrolytes were determined by constant potential chronoamperometry combined with EIS, and the Li||xF-LLZO CSE||Li cell were polarized with a DC voltage of 10 mV, and the initial current ( $I_0$ ) and steady-state current ( $I_{ss}$ ) flowing through the cell were measured for 6000s.  $R_0$  and  $R_{ss}$  are the resistance values before and after the system perturbation, respectively, and they were calculated from the battery impedance spectra in the frequency range of 1 MHz to 1 mHz, and the oscillation voltage is 10 mV. The Li<sup>+</sup> transference number is calculated by the following equation:

$$t_{L_i}^+ = \frac{I_{ss}(\Delta V - I_0 R_0)}{I_0(\Delta V - I_{ss} R_{ss})}$$

A LiFePO<sub>4</sub>||Li cells was assembled by sandwiching the as-prepared CSE membranes between metallic lithium and LiFePO<sub>4</sub> (LFP) cathode to test their cycling performance on the battery test system (China Land) in a voltage range of 2.6~3.9 V

at room temperature. The cells described above were all assembled in an argon-filled glove box. In order to wet the interface and reduce the interface resistance, 10  $\mu\text{L}$  of electrolyte (1 M  $\text{LiPF}_6$  in EC: DMC) was added dropwise to the solid–solid contact interface in all batteries.

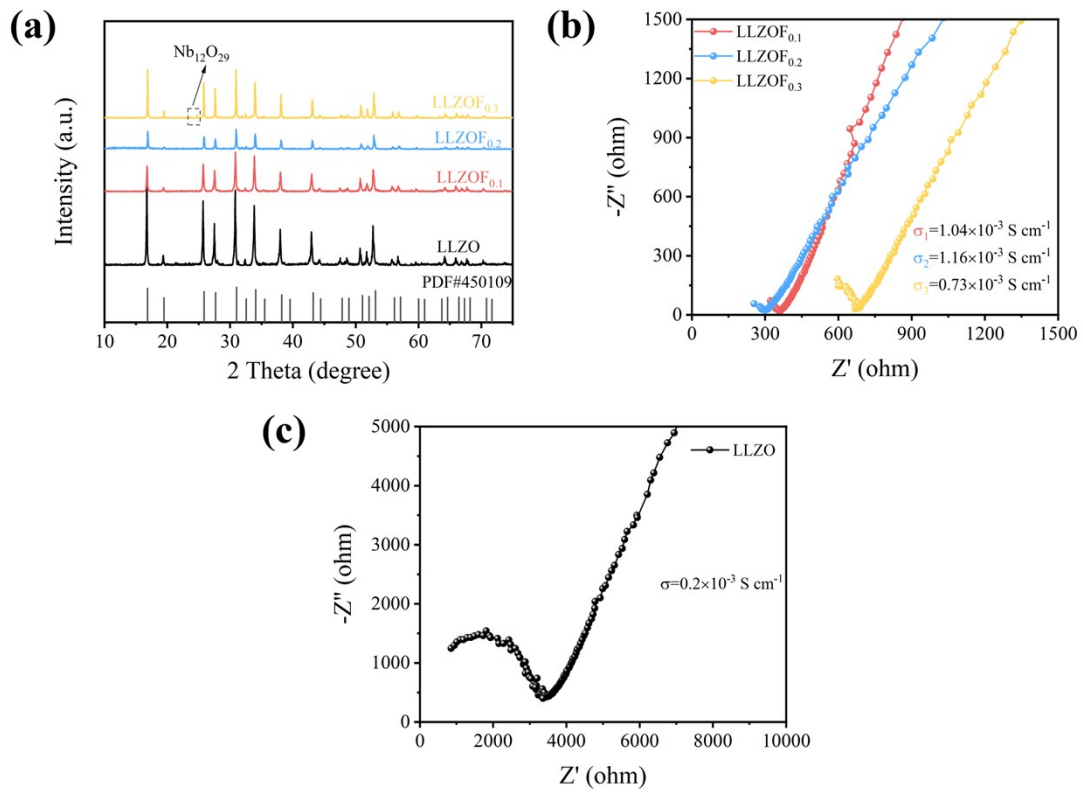

**Fig. S1.** (a) XRD patterns of garnet-type LLZO F<sub>x</sub>; (b-c) The ionic conductivity of the garnet-type LLZO F<sub>x</sub>.

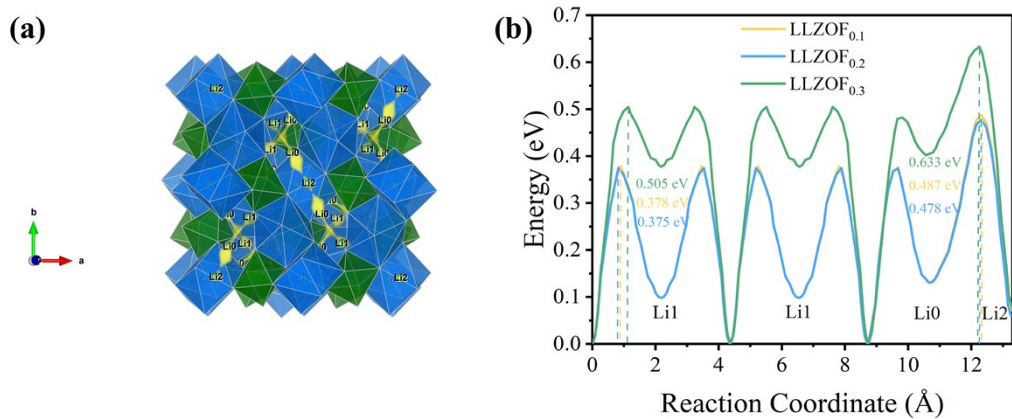

**Fig. S2.** (a) Schematic image of the yellow channel represents the diffusion path of Li ions in  $\text{LLZO}_{0.2}$ , and (b) the bond valence site energy (BVSE) of the corresponding migration barrier in three samples<sup>1-3</sup>.

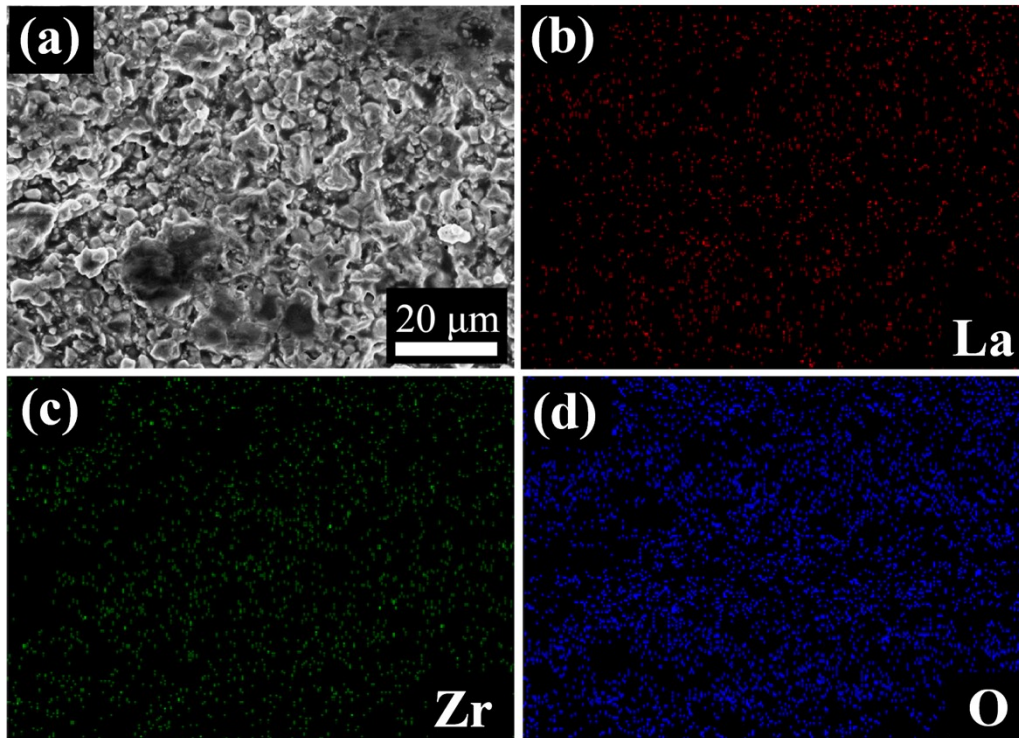

**Fig. S3.** SEM image (a) and EDS elemental mappings of (b) La, (c) Zr and (d) O in LLZO.

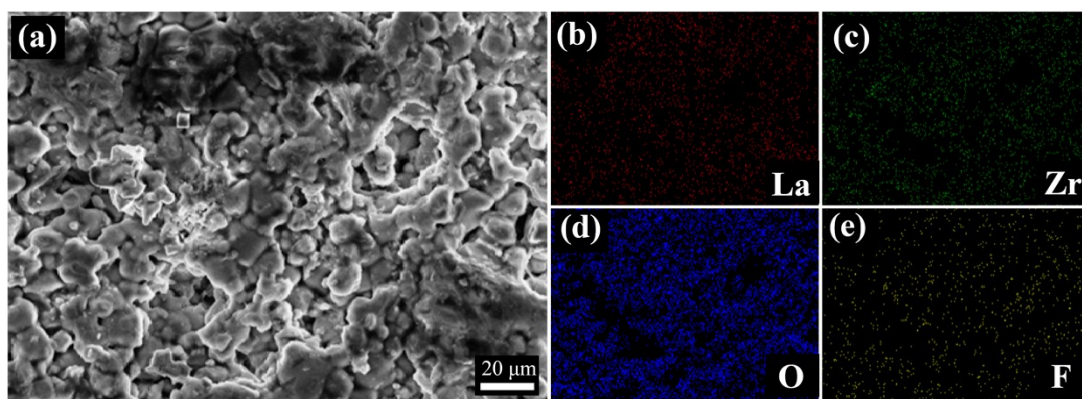

**Fig. S4.** SEM image (a) and EDS elemental mappings of (b) La, (c) Zr, (d) O and (e) F in LLZO<sub>0.2</sub>.

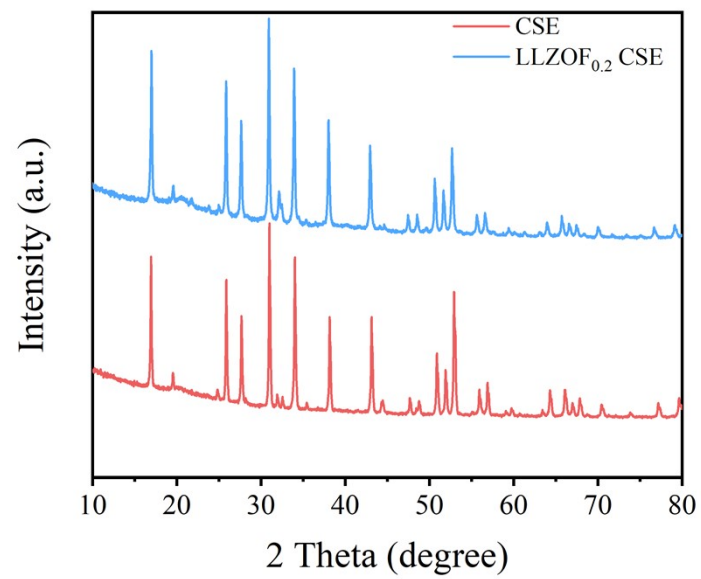

**Fig. S5.** XRD patterns of CSE and LLZO<sub>F0.2</sub> based CSE.



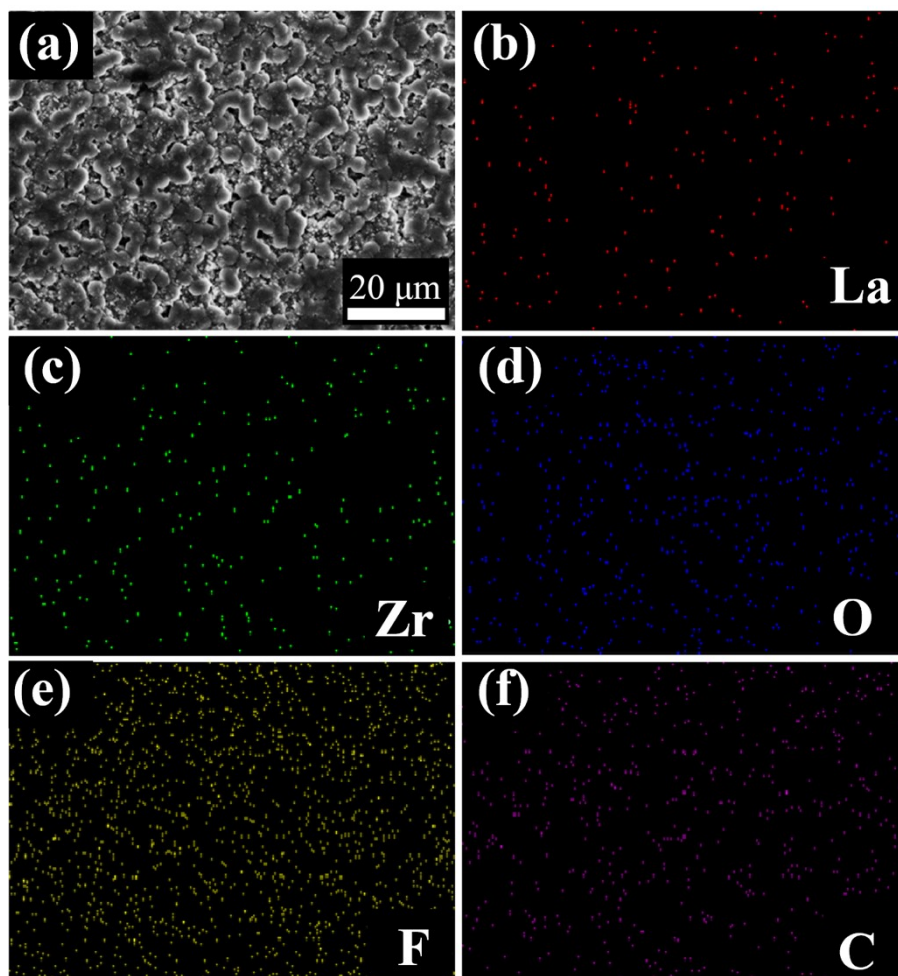

**Fig. S6.** SEM image (a) and EDS elemental mappings of (b) La, (c) Zr, (d) O, (e) F and (f) C in LLZO<sub>F0.2</sub> CSE.

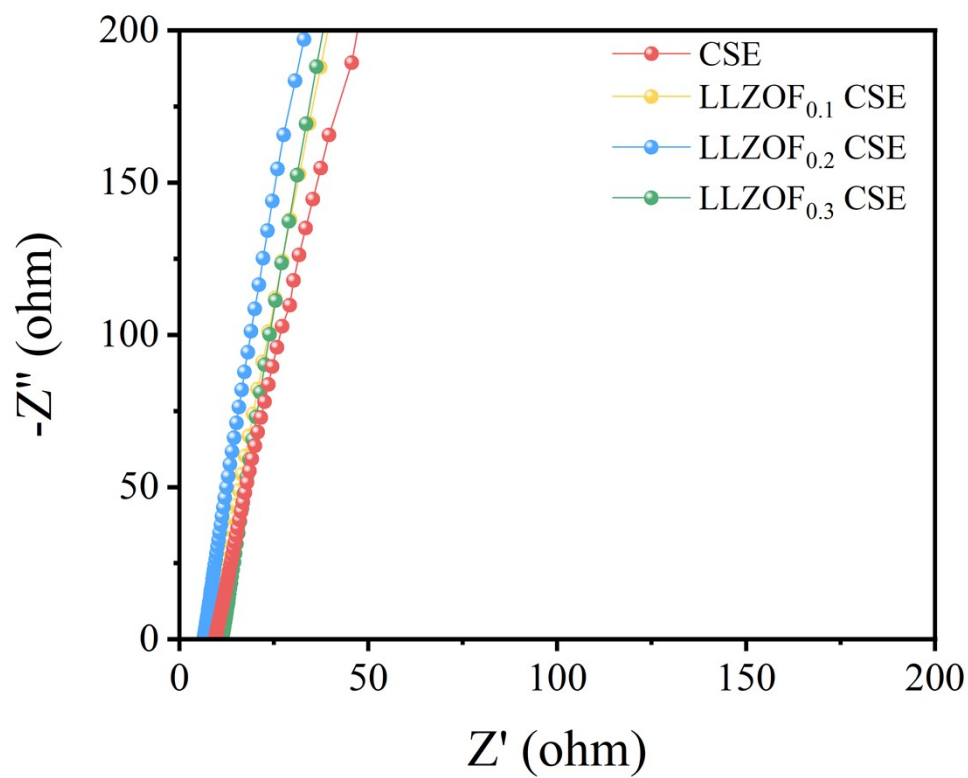

**Fig.S7.** EIS spectra of SS||SS cells with LLZOF<sub>x</sub> CSEs at room temperature.

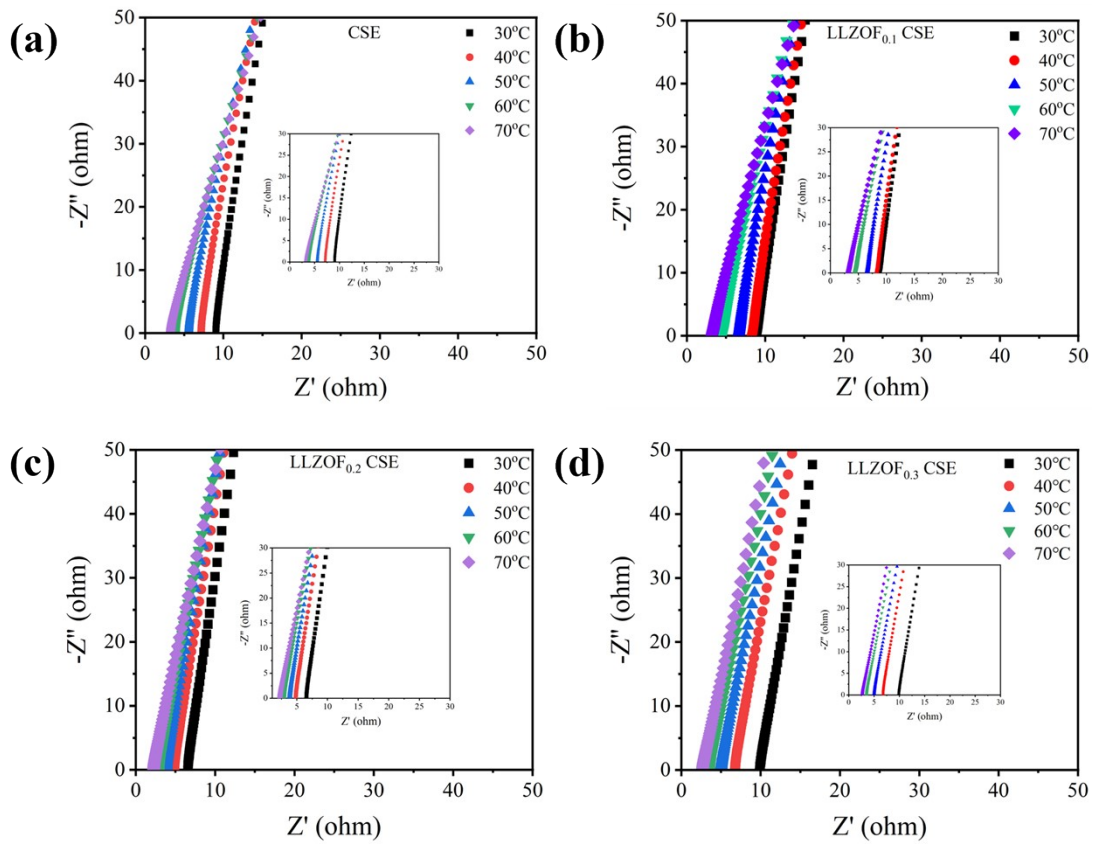

**Fig. S8.** Ionic conductivities of LLZO<sub>x</sub> CSEs in the range 30-70°C. (a) CSE; (b) LLZO<sub>0.1</sub> CSE; (c) LLZO<sub>0.2</sub> CSE; (d) LLZO<sub>0.3</sub> CSE.

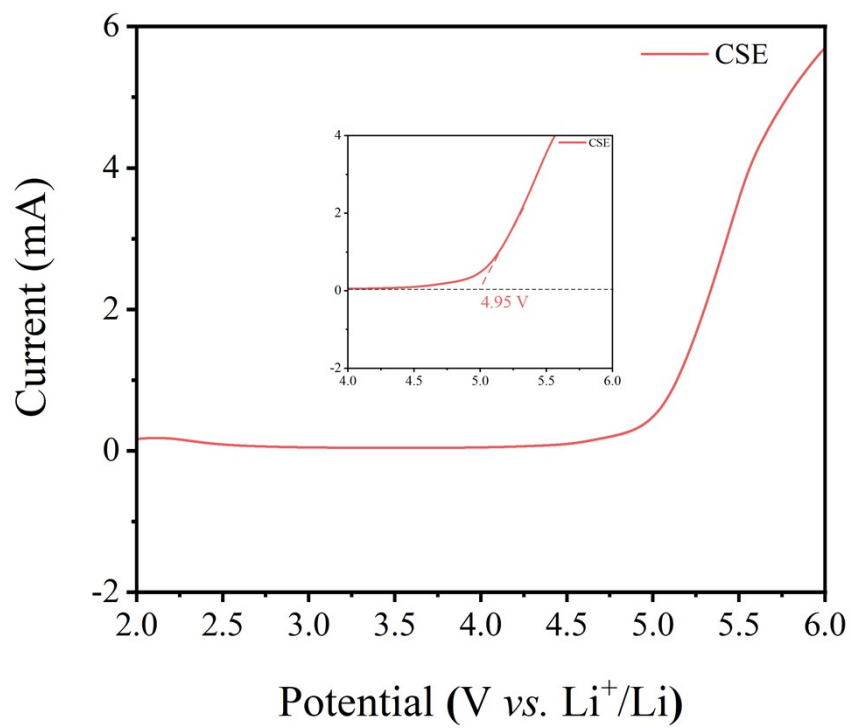

**Fig. S9.** LSV curve of CSE.

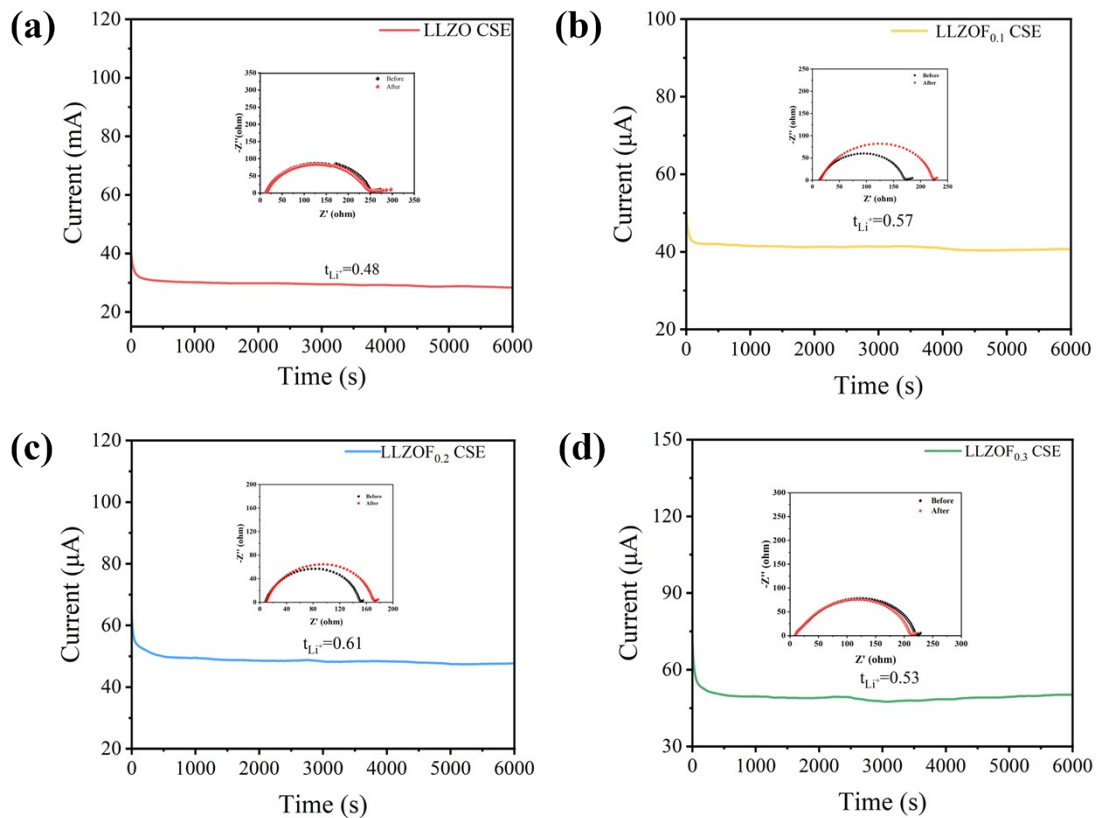

**Fig. S10.** Current-time profile of the Li||Li symmetric cells after application of 10 mV DC voltage for determination of  $\text{Li}^+$  transfer number. The EIS curves of the symmetric cell before and after polarization are shown in the inset. (a) CSE; (b)  $\text{LLZO}_{0.1}$  based CSE; (c)  $\text{LLZO}_{0.2}$  based CSE; (d)  $\text{LLZO}_{0.3}$  based CSE.

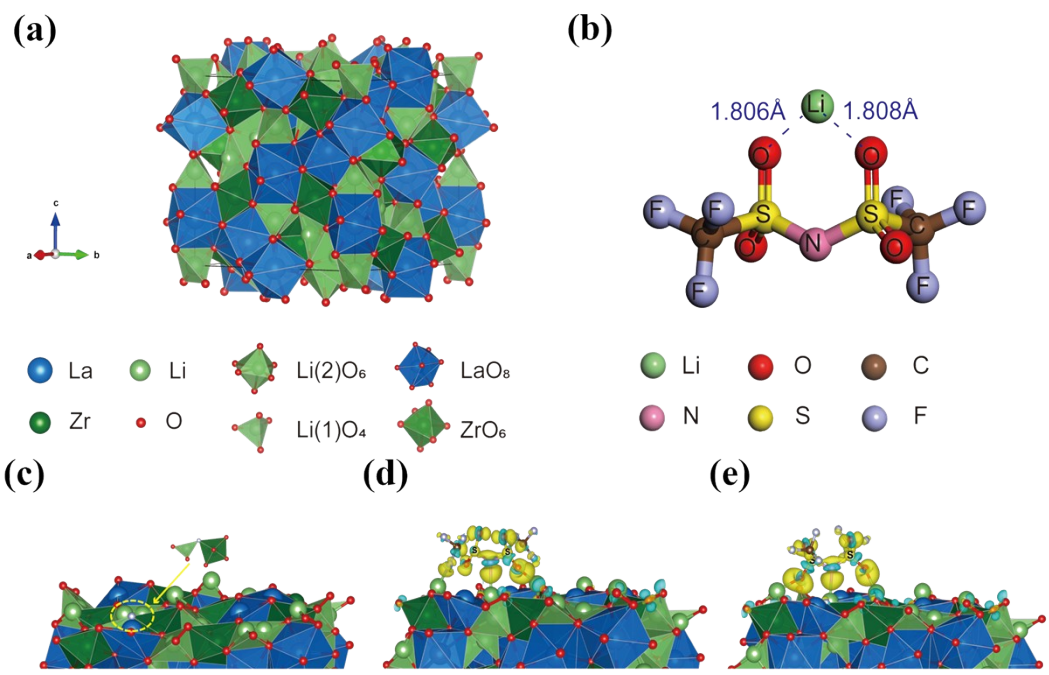

**Fig. S11** (a) The model of  $\text{Li}_7\text{La}_3\text{Zr}_2\text{O}_{12}$ . (b) The model of LiTFSI. (c) The model depicts the (110) surface of  $\text{LLZO}_{0.2}$  and the atoms circled in yellow is F atom. (d) The Charge transfer at the LLZO (110)-TFSI<sup>-</sup> interface. (e) the  $\text{LLZO}_{0.2}$  (110)-TFSI<sup>-</sup> interface by charge density difference. Yellow and blue indicate charge accumulation and charge depletion, respectively.

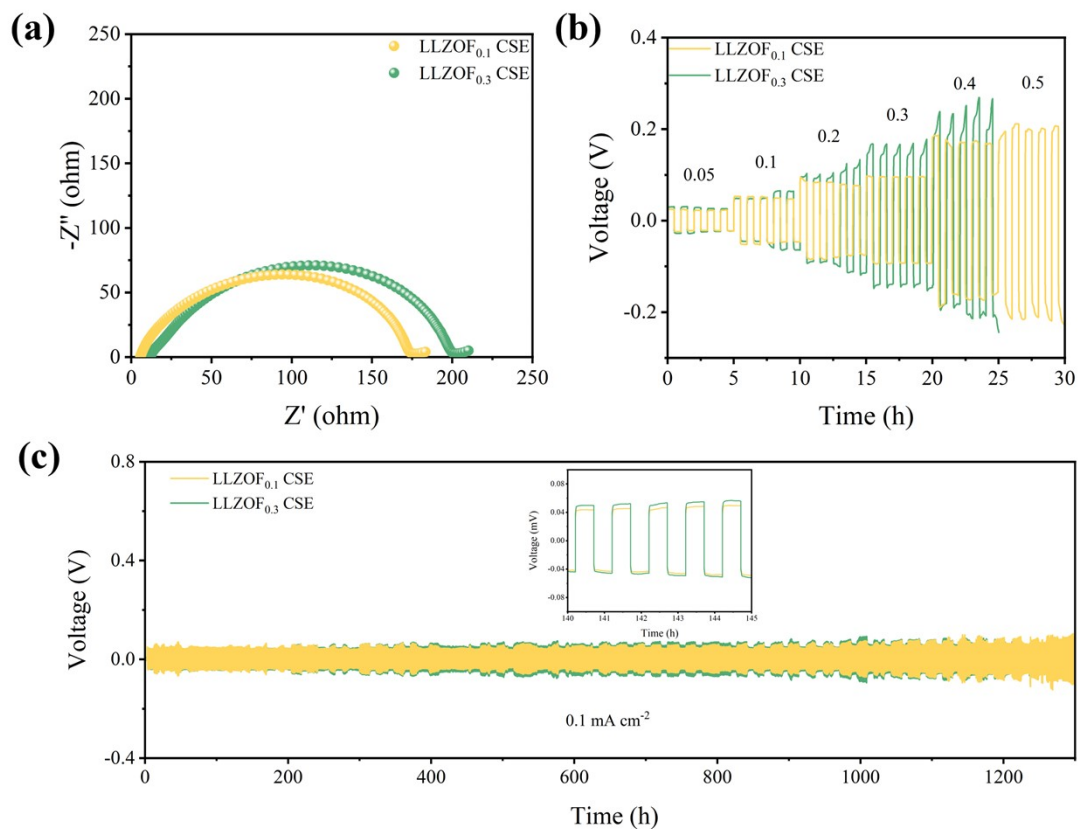

**Fig. S12.** (a) The interface resistance of Li symmetric cells with LLZO<sub>0.1</sub> CSE and LLZO<sub>0.3</sub> CSE; (b) The critical current density (CCD) of Li||LLZO<sub>0.1</sub> CSE ||Li and Li||LLZO<sub>0.3</sub> CSE||Li cell; (c) Voltage profiles of symmetric coin cells at 0.1 mA cm<sup>-2</sup>, and the inset shows the enlarged voltage profiles of the symmetric cells during 141~145 h.

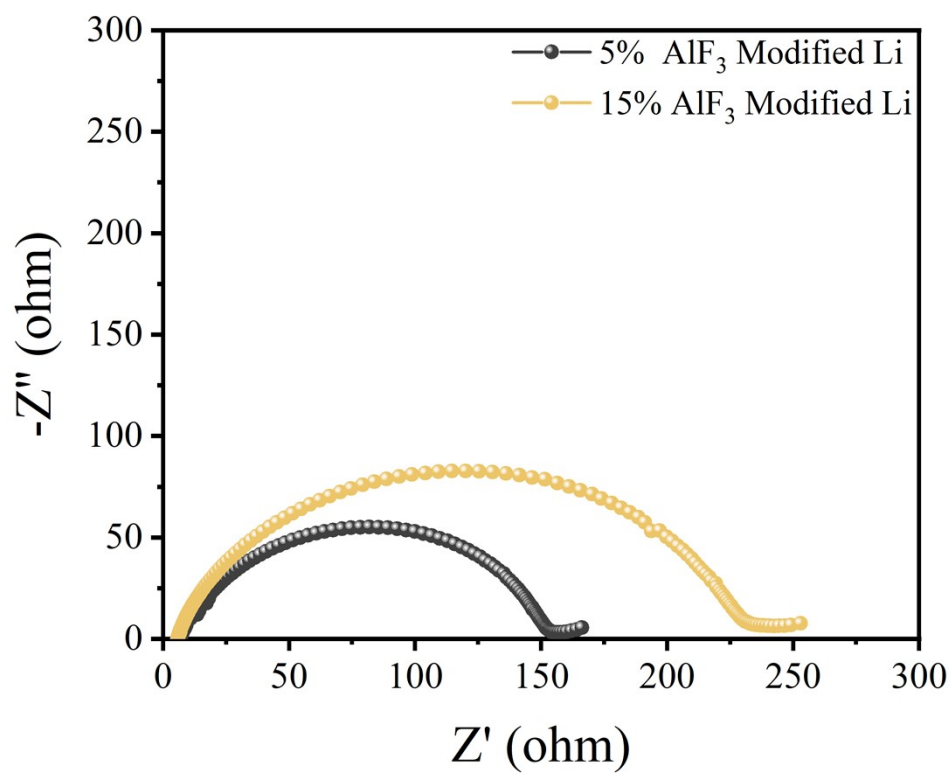

**Fig. S13.** The interfacial resistance of Li symmetric cells with different concentrations  $\text{AlF}_3$  in DMSO solvent.



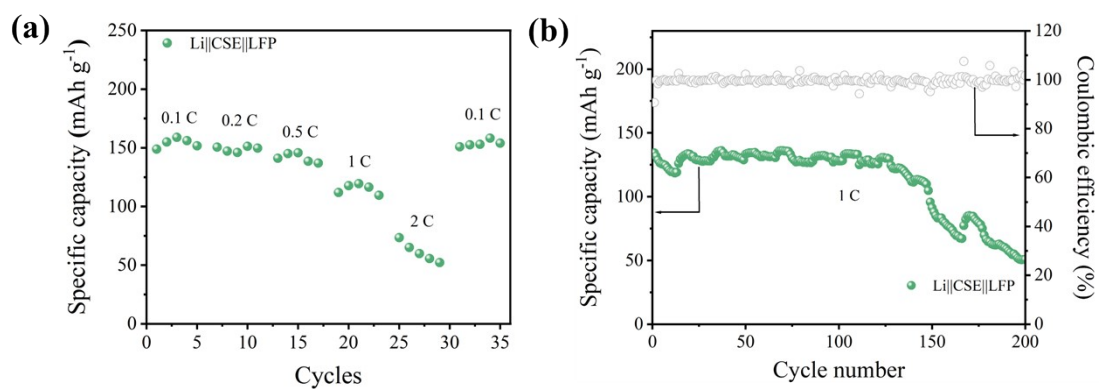

**Fig. S14.** The rate and cycling performance of Li||CSE||LFP. (a) Rate performance; (b) Cycling performance.

**Table S1.** A comparison of ionic conductivity of the LLZOF<sub>0.2</sub> based CSE with composite electrolytes reported in the literatures.

| Electrolyte              | Ionic conductivity at room temperature  | References |
|--------------------------|-----------------------------------------|------------|
| SSE-10                   | $1.1 \times 10^{-4} \text{ S cm}^{-1}$  | 4          |
| PCEs                     | $1.8 \times 10^{-4} \text{ S cm}^{-1}$  | 5          |
| 3D CPE                   | $9.2 \times 10^{-5} \text{ S cm}^{-1}$  | 6          |
| PDOL/LLZTO               | $2.9 \times 10^{-4} \text{ S cm}^{-1}$  | 7          |
| PEGMEM@LLZTO             | $3.16 \times 10^{-4} \text{ S cm}^{-1}$ | 8          |
| <b>O</b>                 |                                         |            |
| PLLB                     | $1.16 \times 10^{-4} \text{ S cm}^{-1}$ | 9          |
| NDCPE-5%                 | $2.9 \times 10^{-4} \text{ S cm}^{-1}$  | 10         |
| CSE-Ice-60               | $1.2 \times 10^{-4} \text{ S cm}^{-1}$  | 11         |
| LLZOF <sub>0.2</sub> CSE | $3.9 \times 10^{-4} \text{ S cm}^{-1}$  | This work  |

### References

1. S. Adams and R. P. Rao, High power lithium ion battery materials by computational design, *physica status solidi (a)*, 2011, **208**, 1746-1753.
2. H. Chen and S. Adams, Bond softness sensitive bond-valence parameters for crystal structure plausibility tests, *IUCrJ*, 2017, **4**, 614-625.
3. H. Chen, L. L. Wong and S. Adams, SoftBV-a software tool for screening the materials genome of inorganic fast ion conductors, *Acta Crystallogr B Struct Sci Cryst Eng Mater*, 2019, **75**, 18-33.
4. J. Yu, S. C. T. Kwok, Z. Lu, M. B. Effat, Y. Q. Lyu, M. M. F. Yuen and F. Ciucci, A ceramic-PVDF composite membrane with modified interfaces as an ion-conducting electrolyte for solid-state lithium-ion batteries operating at room temperature, *ChemElectroChem*, 2018, **5**, 2873-2881.
5. Z. Li, H.-X. Xie, X.-Y. Zhang and X. Guo, In situ thermally polymerized solid composite electrolytes with a broad electrochemical window for all-solid-state lithium metal batteries, *Journal of Materials Chemistry A*, 2020, **8**, 3892-3900.
6. S. Song, X. Qin, Y. Ruan, W. Li, Y. Xu, D. Zhang and J. Thokchom, Enhanced performance of solid-state lithium-air batteries with continuous 3D garnet network added composite polymer electrolyte, *Journal of Power Sources*, 2020, **461**, 228146-228152.
7. L. X. Li, R. Li, Z. H. Huang, H. Yang, M. Q. Liu, J. Xiang, S. Hussain, X. Q. Shen and M. X. Jing, A multifunctional gradient solid electrolyte remarkably improving interface compatibility and ion transport in solid-state lithium battery, *ACS Applied Materials & Interfaces*, 2022, **14**,

30786-30795.

8. Z. Gu, X. Xin, Z. Xu, J. He, J. Wu, Y. Sun and X. Yao, Garnet electrolyte-based integrated architecture for high-performance all-solid-state lithium-oxygen batteries, *Advanced Functional Materials*, 2023, **33**, 2301583-2301593.
9. C. Lei, J. Li, Z. Tan, Y. Li, P. He, Y. Liu, Y. Li, F. Wu, Y. Cheng and Z. He, Double-layer electrolyte boosts cycling stability of all-solid-state li metal batteries, *ACS Applied Materials & Interfaces*, 2023, **15**, 31572-31583.
10. S. Lv, X. He, Z. Ji, S. Yang, L. Feng, X. Fu, W. Yang and Y. Wang, A supertough and highly-conductive nano-dipole doped composite polymer electrolyte with hybrid Li<sup>+</sup>-solvation microenvironment for lithium metal batteries, *Advanced Energy Materials*, 2023, **13**, 2302711-2302725.
11. R.-J. Pei, Y.-F. Li, T. Song, N. Chen and R. Yang, A solid composite electrolyte of 3D framework Li<sub>6.25</sub>La<sub>3</sub>Sn<sub>1.25</sub>Bi<sub>0.75</sub>O<sub>12</sub> for rechargeable solid-state batteries, *Journal of Alloys and Compounds*, 2023, **933**, 167639-167648.
